# Supplementary material
Source: Springer Nature journal article supplement (https://www.springermedizin.de/resource/supplementary/12884_2013_1300_MOESM5_ESM.pdf/9459364)

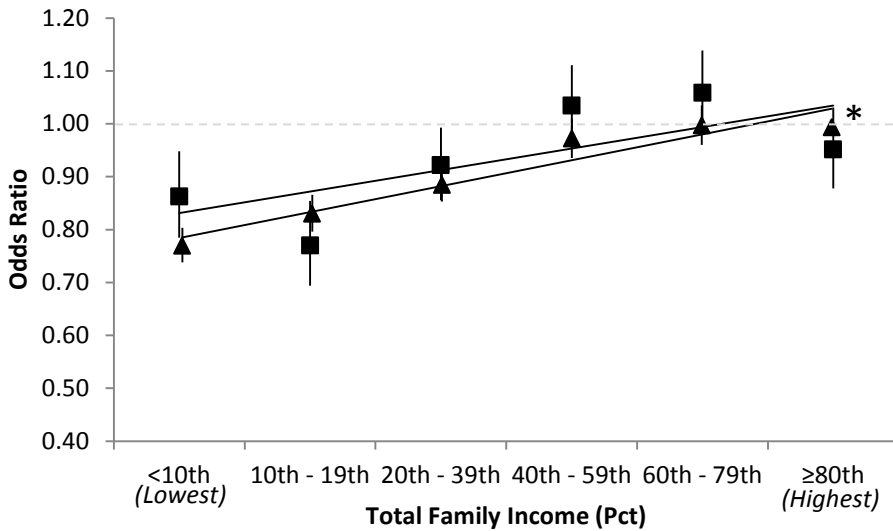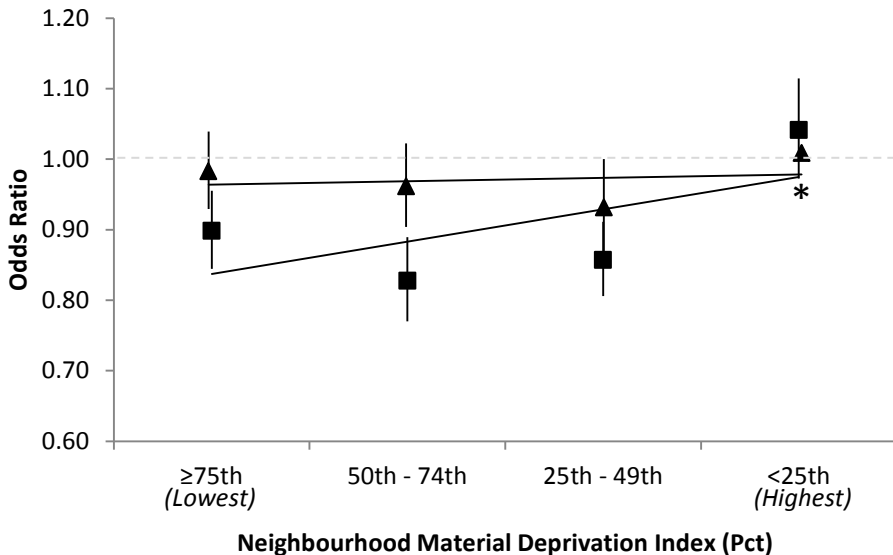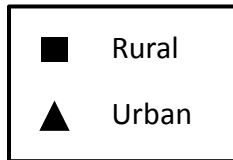

\* Reference Group

Supplement: MOESM5 [file 9459364]
